# Supplementary material
Source: PubMed Central journal article supplement (PMC60115)
Supplement: pnas_98_22_12689__2.pdf [file pnas_98_22_12689__2.pdf]

**Table 4.** *pfmdr1* primers and SSOPs

| <b>Primers for region I</b>        |    |      |     |            |     |                        |               |
|------------------------------------|----|------|-----|------------|-----|------------------------|---------------|
| 727up*                             | 5' | -GTG | TTT | GGT        | GTA | ATA TTA AAG-3'         |               |
| 1080dn                             | 5' | -CAA | ACG | TGC        | ATT | TTT TAT TAA TG-3'      |               |
| <b>Probes for region I</b>         |    |      |     |            |     |                        |               |
|                                    |    |      |     |            |     | <b>Wash stringency</b> |               |
| 86N <sup>†</sup>                   | 5' | -GAA | CAT | <u>GAA</u> | TTT | AGG T-3'               | 1× SSC 37°C   |
| 86Y                                | 5' | -GAA | CAT | <u>GTA</u> | TTT | AGG T-3'               | 1× SSC 37°C   |
| 184Y                               | 5' | -AGG | TTT | <u>ATA</u> | TAT | TTG GT-3'              | 1× SSC 37°C   |
| 184F                               | 5' | -AGG | TTT | <u>ATT</u> | TAT | TTG GT-3'              | 1× SSC 37°C   |
| <b>Nest1 primers for region II</b> |    |      |     |            |     |                        |               |
| 3439up                             | 5' | -GAT | CCA | AGT        | TTT | TTA ATA CAG G-3'       |               |
| 4490dn                             | 5' | -TTA | GGT | TCT        | CTT | AAT AAT GCT C-3'       |               |
| <b>Nest2 primers for region II</b> |    |      |     |            |     |                        |               |
| 3570up                             | 5' | -TAT | TGT | AAA        | TGC | AGC TTT ATG G-3'       |               |
| 4264dn                             | 5' | -GAC | TAA | CTA        | TTG | AAA ATA AGT TTC-3'     |               |
| <b>Probes for region II</b>        |    |      |     |            |     |                        |               |
|                                    |    |      |     |            |     | <b>Wash stringency</b> |               |
| 1034S                              | 5' | -GGA | TTC | <u>AGT</u> | CAA | AGC-3'                 | 0.4× SSC 39°C |
| 1034C                              | 5' | -GGA | TTC | <u>TGT</u> | CAA | AGC-3'                 | 0.4× SSC 39°C |
| 1042N                              | 5' | -ATT | TAT | <u>TAA</u> | TAG | TTT TGC-3'             | 1× SSC 39°C   |
| 1042D                              | 5' | -TT  | TAT | <u>TGA</u> | TAG | TTT TGC-3'             | 1× SSC 39°C   |
| 1246D                              | 5' | -ACT | TAA | <u>GAG</u> | ATC | TTA G-3'               | 1× SSC 37°C   |
| 1246Y                              | 5' | -ACT | TAA | <u>GAT</u> | ATC | TTA GA-3'              | 1× SSC 37°C   |

PCR amplification of two *pfmdr1*-specific sequences was performed by using primers identified in Table 4. Nomenclature for PCR primers is based on the nucleotide sequence numbering of GenBank X56851 (1). For amplification of the 353-bp *pfmdr1* region I, a nested PCR strategy was not necessary. Reactions used 727up and 1080dn primers covering polymorphic codons 86 and 184. For *pfmdr1* region II, nest 1 reactions used 3439up and 4490dn, and nest 2 reactions used 3570up and 4264dn covering polymorphic codons 1034, 1042, and 1246. PCR conditions to amplify the region spanning codons 84 and 186 were: 95°C for 30 sec, 58°C for 30 sec, 72°C for 30 sec (40×). Nest 1 conditions to amplify the region spanning codons 1034, 1042, and 1246 were: 95°C for 30 sec, 58°C for 30 sec, 72°C for 90 sec (40×). Conditions for the nest 2 amplification were: 95°C for 30 sec, 58°C for 30 sec, 72°C for 1 min (40×).

\*Nucleotide coordinates based on GenBank accession no. X56851.

<sup>†</sup>Probe nomenclature based on codon number (2).

References:

1. Triglia, T., Foote, S. J., Kemp, D. J. & Cowman, A. F. (1991) *Mol. Cell. Biol.* **11**, 5244-5250.
2. Fidock, D. A., Nomura, T. & Wellems, T. E. (1998) *Mol. Pharmacol.* **54**, 1140-1147.
