# Supplementary material
Source: PubMed Central journal article supplement (PMC60115)
Supplement: pnas_98_22_12689__3.pdf [file pnas_98_22_12689__3.pdf]

**Table 5.** Summary of *pfprt*, *cg2*, and *pfmdr1* polymorphism and CQ susceptibility among *P. falciparum* strains

|    | Sample          | Origin     | Date        | <i>Pfprt</i> allele* |          |          |          |          | <i>cg2</i><br>ω | <i>Pfmdr1</i> allele* |          |          |          |          | CQ IC <sub>50</sub> <sup>†</sup> |       | VR,<br>ng/ml | <i>In vitro</i> <sup>‡</sup><br>CQ | Clinical <sup>§</sup> | Data <sup>¶</sup> |
|----|-----------------|------------|-------------|----------------------|----------|----------|----------|----------|-----------------|-----------------------|----------|----------|----------|----------|----------------------------------|-------|--------------|------------------------------------|-----------------------|-------------------|
|    |                 |            |             | 72                   | 73       | 74       | 75       | 76       |                 | 86                    | 184      | 1034     | 1042     | 1246     | nM                               | ng/ml |              |                                    |                       |                   |
| 1  | 3B-D5           | -          | -           | C                    | V        | I        | E        | T        | -               | -                     | -        | -        | -        | -        | -                                | -     | -            | -                                  | -                     | 1, 4              |
| 2  | 328             | PNG        | 1995        | S                    | V        | M        | N        | T        | -               | -                     | -        | -        | -        | -        | -                                | -     | -            | -                                  | -                     | 1, 4              |
| 3  | Cl.# 7          | PNG        | 1995        | S                    | V        | M        | N        | T        | -               | -                     | -        | -        | -        | -        | -                                | -     | -            | -                                  | -                     | 1, 4              |
| 4  | <b>BT3</b>      | <b>SEA</b> | <b>1989</b> | <b>C</b>             | <b>V</b> | <b>I</b> | <b>E</b> | <b>T</b> | <b>-</b>        | <b>N</b>              | <b>F</b> | <b>S</b> | <b>D</b> | <b>D</b> | -                                | 320   | -            | R                                  | R                     | 1, 4              |
| 5  | CSL2            | SEA        | 1986        | C                    | V        | I        | E        | T        | -               | Y                     | Y        | S        | N        | D        | 156                              | 78    | -            | R                                  | R                     | 1, 4              |
| 6  | D10             | PNG        | 1979        | C                    | V        | M        | N        | K        | 13              | N                     | Y        | S        | N        | D        | 12                               | 6     | -            | S                                  | S                     | 1, 2, 3, 4        |
| 7  | FCR3            | Africa     | 1976        | C                    | V        | I        | E        | T        | -               | Y                     | Y        | S        | N        | D        | 200                              | 100   | -            | R                                  | R                     | 1, 4              |
| 8  | 7G8             | SA         | -           | S                    | V        | M        | N        | T        | -               | N                     | F        | C        | D        | Y        | 58                               | 29    | -            | R                                  | R                     | 1, 3, 4           |
| 9  | Ghana           | Africa     | -           | C                    | V        | M        | N        | K        | -               | N                     | F        | S        | N        | D        | 12.6                             | 6.3   | -            | S                                  | S                     | 1, 4              |
| 10 | ITG2            | SA         | -           | C                    | V        | I        | E        | T        | -               | Y                     | Y        | S        | N        | D        | 142                              | 71    | -            | R                                  | R                     | 1, 4              |
| 11 | K1              | SEA        | -           | C                    | V        | I        | E        | T        | -               | Y                     | Y        | S        | N        | D        | 320                              | 160   | -            | R                                  | R                     | 1, 4              |
| 12 | V1              | SEA        | -           | C                    | V        | I        | E        | T        | -               | Y                     | Y        | S        | N        | D        | 370                              | 185   | -            | R                                  | R                     | 1, 4              |
| 13 | W2-Mef          | SEA        | -           | C                    | V        | I        | E        | T        | -               | Y                     | Y        | S        | N        | D        | 73                               | 36.5  | -            | R                                  | R                     | 1, 4              |
| 14 | <b>PF 120</b>   | <b>SEA</b> | <b>1989</b> | <b>C</b>             | <b>V</b> | <b>I</b> | <b>E</b> | <b>T</b> | <b>-</b>        | <b>N</b>              | <b>F</b> | <b>S</b> | <b>D</b> | <b>D</b> | -                                | 320   | -            | R                                  | R                     | 1, 4              |
| 15 | PF 125          | SEA        | 1989        | C                    | V        | I        | E        | T        | -               | N                     | F        | S/C      | D        | D        | -                                | 320   | -            | R                                  | R                     | 1, 4              |
| 16 | PNG 1787        | PNG        | 1987        | C                    | V        | M        | N        | K        | -               | N                     | Y        | S        | N        | D        | 20                               | 10    | -            | S                                  | S                     | 1, 4              |
| 17 | <b>PNG 1917</b> | <b>PNG</b> | <b>1987</b> | <b>S</b>             | <b>V</b> | <b>M</b> | <b>N</b> | <b>T</b> | <b>-</b>        | <b>N</b>              | <b>F</b> | <b>S</b> | <b>N</b> | <b>D</b> | 38                               | 19    | -            | R                                  | S                     | 1, 4              |
| 18 | PNG 1775        | PNG        | 1987        | S                    | V        | M        | N        | T        | -               | Y                     | Y        | S        | N        | D        | 112                              | 56    | -            | R                                  | R                     | 1, 4              |
| 19 | PNG 1776        | PNG        | 1987        | S                    | V        | M        | N        | T        | -               | Y                     | Y        | S        | N        | D        | 100                              | 50    | -            | R                                  | R                     | 1, 4              |
| 20 | PNG 1904        | PNG        | 1987        | S                    | V        | M        | N        | T        | -               | Y                     | Y        | S        | N        | D        | 112                              | 56    | -            | R                                  | R                     | 1, 4              |
| 21 | PNG 1905        | PNG        | 1987        | S                    | V        | M        | N        | T        | -               | N                     | F        | C        | D        | Y        | 200                              | 100   | -            | R                                  | R                     | 1, 4              |
| 22 | PNG 1933        | PNG        | 1987        | S                    | V        | M        | N        | T        | -               | Y                     | Y        | S        | N        | D        | 178                              | 89    | -            | R                                  | R                     | 1, 4              |
| 23 | PNG 1934        | PNG        | 1987        | S                    | V        | M        | N        | T        | -               | Y                     | Y        | S        | N        | D        | 100                              | 50    | -            | R                                  | R                     | 1, 4              |
| 24 | PNG 1935        | PNG        | 1987        | S                    | V        | M        | N        | T        | -               | Y                     | Y        | S        | N        | D        | 158                              | 79    | -            | R                                  | R                     | 1, 4              |
| 25 | Dd2             | Indochina  | -           | C                    | V        | I        | E        | T        | 16              | Y                     | Y        | S        | N        | D        | 128                              | 64    | 16           | R                                  | -                     | 2, 3              |
| 26 | V1/S            | Viet Nam   | -           | C                    | V        | I        | E        | T        | 16              | -                     | -        | -        | -        | -        | 192                              | 96    | 20           | R                                  | -                     | 2, 3              |
| 27 | TM284           | Thailand   | -           | C                    | V        | I        | E        | T        | 16              | -                     | -        | -        | -        | -        | 160                              | 80    | 16           | R                                  | -                     | 2, 3              |
| 28 | TM180           | Thailand   | -           | -                    | -        | -        | -        | -        | 16              | -                     | -        | -        | -        | -        | 160                              | 80    | 24           | R                                  | -                     | 2                 |
| 29 | ItG2F6          | SEA        | -           | C                    | V        | I        | E        | T        | 16              | Y                     | F        | S        | N        | D        | 128                              | 64    | 7            | R                                  | -                     | 2, 3              |

|    | Sample       | Origin       | Date     | <i>Pfcr</i> allele* |          |          |          |          | cg2<br>ω  | <i>Pfmdr1</i> allele* |          |          |          |          | CQ IC <sub>50</sub> <sup>†</sup> |       | VR,<br>ng/ml | <i>In vitro</i> <sup>‡</sup><br>CQ | Clinical <sup>§</sup> | Data <sup>¶</sup> |
|----|--------------|--------------|----------|---------------------|----------|----------|----------|----------|-----------|-----------------------|----------|----------|----------|----------|----------------------------------|-------|--------------|------------------------------------|-----------------------|-------------------|
|    |              |              |          | 72                  | 73       | 74       | 75       | 76       |           | 86                    | 184      | 1034     | 1042     | 1246     | nM                               | ng/ml |              |                                    |                       |                   |
| 30 | INDO         | Indochina    | -        | -                   | -        | -        | -        | 16       | N         | F                     | C        | D        | Y        | 240      | 120                              | 24    | R            | -                                  | 2                     |                   |
| 31 | Jcl          | Cambodia     | -        | C                   | V        | I        | E        | T        | 16        | N                     | F        | -        | -        | D        | 140                              | 70    | 24           | R                                  | -                     | 2, 3              |
| 32 | <b>102/1</b> | <b>Sudan</b> | <b>-</b> | <b>C</b>            | <b>V</b> | <b>I</b> | <b>E</b> | <b>T</b> | <b>16</b> | <b>N</b>              | <b>F</b> | <b>S</b> | <b>N</b> | <b>D</b> | 170                              | 85    | 12           | R                                  | -                     | 2, 3              |
| 33 | 124/1        | Sudan        | -        | -                   | -        | -        | -        | 16       | Y         | F                     | S        | N        | D        | 146      | 73                               | 27    | R            | -                                  | 2                     |                   |
| 34 | 128/4        | Sudan        | -        | -                   | -        | -        | -        | 16       | -         | -                     | -        | -        | -        | 90       | 45                               | 11    | R            | -                                  | 2                     |                   |
| 35 | 123/5        | Sudan        | -        | -                   | -        | -        | -        | 16       | -         | -                     | -        | -        | -        | 128      | 64                               | 18    | R            | -                                  | 2                     |                   |
| 36 | RB1          | S. Africa    | -        | -                   | -        | -        | -        | 16       | Y         | -                     | S        | N        | D        | 240      | 120                              | 20    | R            | -                                  | 2                     |                   |
| 37 | RB6          | S. Africa    | -        | -                   | -        | -        | -        | 16       | Y         | Y                     | S        | N        | D        | 192      | 96                               | 16    | R            | -                                  | 2                     |                   |
| 38 | RB8          | S. Africa    | -        | C                   | V        | I        | E        | T        | 16        | Y                     | Y        | S        | N        | D        | 120                              | 60    | -            | R                                  | -                     | 2, 3              |
| 39 | R20          | S. Africa    | -        | C                   | V        | I        | E        | T        | 16        | Y                     | -        | S        | N        | D        | 240                              | 120   | -            | R                                  | -                     | 2, 3              |
| 40 | PAR          | Uganda       | -        | C                   | V        | I        | E        | T        | 16        | Y                     | Y        | S        | N        | D        | 128                              | 64    | 16           | R                                  | -                     | 2, 3              |
| 41 | <b>KMWII</b> | <b>Kenya</b> | <b>-</b> | <b>C</b>            | <b>V</b> | <b>I</b> | <b>E</b> | <b>T</b> | <b>16</b> | <b>N</b>              | <b>F</b> | <b>S</b> | <b>N</b> | <b>D</b> | 80                               | 40    | 9            | R                                  | -                     | 2, 3              |
| 42 | M2           | Mali         | -        | C                   | V        | I        | E        | T        | 16        | -                     | -        | -        | -        | -        | 120                              | 60    | 10           | R                                  | -                     | 2, 3              |
| 43 | Cbi          | Sao Tome     | -        | -                   | -        | -        | -        | 16       | Y         | Y                     | S        | N        | D        | 100      | 50                               | 20    | R            | -                                  | 2                     |                   |
| 44 | DIV30        | Brazil       | -        | S                   | V        | M        | N        | T        | -         | -                     | -        | -        | -        | -        | -                                | -     | R            | -                                  | 3                     |                   |
| 45 | ICSN66       | Brazil       | -        | S                   | V        | M        | N        | T        | -         | -                     | -        | -        | -        | -        | -                                | -     | R            | -                                  | 3                     |                   |
| 46 | ECP          | Brazil       | -        | S                   | V        | M        | N        | T        | -         | -                     | -        | -        | -        | -        | -                                | -     | R            | -                                  | 3                     |                   |
| 47 | PAD          | Brazil       | -        | S                   | V        | M        | N        | T        | -         | -                     | -        | -        | -        | -        | -                                | -     | R            | -                                  | 3                     |                   |
| 48 | ItD12        | Brazil       | -        | S                   | V        | M        | N        | T        | -         | -                     | -        | -        | -        | -        | -                                | -     | R            | -                                  | 3                     |                   |
| 49 | Ecu1110      | Ecuador      | -        | C                   | V        | M        | N        | T        | -         | -                     | -        | -        | -        | -        | -                                | -     | R            | -                                  | 3                     |                   |
| 50 | Jav          | Columbia     | -        | C                   | V        | M        | N        | T        | -         | -                     | -        | -        | -        | -        | -                                | -     | R            | -                                  | 3                     |                   |
| 51 | IAJ          | Columbia     | -        | C                   | V        | M        | N        | T        | -         | -                     | -        | -        | -        | -        | -                                | -     | R            | -                                  | 3                     |                   |
| 52 | T2/C6        | Thailand     | -        | C                   | V        | M        | N        | K        | 18        | N                     | Y        | S        | N        | D        | 10                               | 5     | 5            | S                                  | -                     | 2, 3              |
| 53 | Camp/A6      | Malaysia     | -        | C                   | V        | M        | N        | K        | 19        | N                     | F        | S        | N        | D        | 8                                | 4     | 4            | S                                  | -                     | 2, 3              |
| 54 | WR-80        | Viet Nam     | -        | -                   | -        | -        | -        | 13       | -         | -                     | -        | -        | -        | 8        | 4                                | 4     | S            | -                                  | 2                     |                   |
| 55 | 105/7        | Sudan        | -        | C                   | V        | M        | N        | K        | 19        | N                     | Y        | S        | N        | D        | 16                               | 8     | 4            | S                                  | -                     | 2, 3              |
| 56 | <b>106/1</b> | <b>Sudan</b> | <b>-</b> | <b>C</b>            | <b>V</b> | <b>I</b> | <b>E</b> | <b>K</b> | <b>16</b> | <b>Y</b>              | <b>Y</b> | <b>S</b> | <b>N</b> | <b>D</b> | 16                               | 8     | 6            | S                                  | -                     | 2, 3              |
| 57 | REN          | Sudan        | -        | C                   | V        | M        | N        | K        | 24        | N                     | F        | S        | N        | D        | 6                                | 3     | 3            | S                                  | -                     | 2, 3              |
| 58 | FAB9         | S. Africa    | -        | C                   | V        | M        | N        | K        | 10        | N                     | Y        | S        | N        | D        | 10                               | 5     | 5            | S                                  | -                     | 2, 3              |
| 59 | FAB6         | S. Africa    | -        | -                   | -        | -        | -        | 10       | -         | -                     | -        | -        | -        | 18       | 9                                | 9     | S            | -                                  | 2                     |                   |
| 60 | K39          | Kenya        | -        | C                   | V        | M        | N        | K        | 17        | N                     | Y        | S        | N        | D        | 4                                | 2     | -            | S                                  | -                     | 2, 3              |

|    | Sample | Origin        | Date | Pfcr allele* |    |    |    |    | cg2<br>ω | Pfmdr1 allele* |     |      |      |      | CQ IC <sub>50</sub> <sup>†</sup> |       | VR,<br>ng/ml | In<br>vitro <sup>‡</sup><br>CQ | Clinical <sup>§</sup> | Data <sup>¶</sup> |
|----|--------|---------------|------|--------------|----|----|----|----|----------|----------------|-----|------|------|------|----------------------------------|-------|--------------|--------------------------------|-----------------------|-------------------|
|    |        |               |      | 72           | 73 | 74 | 75 | 76 |          | 86             | 184 | 1034 | 1042 | 1246 | nM                               | ng/ml |              |                                |                       |                   |
| 61 | M24    | Kenya         | -    | C            | V  | M  | N  | K  | 11       | N              | F   | S    | N    | D    | 6                                | 3     | 3            | S                              | -                     | 2, 3              |
| 62 | LF4/1  | Liberia       | -    | C            | V  | M  | N  | K  | 19       | N              | S   | S    | N    | D    | 8                                | 4     | 4            | S                              | -                     | 2, 3              |
| 63 | 3D7    | Netherlands   | -    | C            | V  | M  | N  | K  | 19       | N              | Y   | S    | N    | D    | 6                                | 3     | 3            | S                              | -                     | 1, 2, 4           |
| 64 | Niger  | Niger         | -    | -            | -  | -  | -  | -  | 18       | Y              | Y   | S    | N    | D    | 8                                | 4     | -            | S                              | -                     | 2                 |
| 65 | SL/D6  | Sierra Leone  | -    | C            | V  | M  | N  | K  | 20       | N              | S   | S    | N    | D    | 8                                | 4     | 4            | S                              | -                     | 2, 3              |
| 66 | BC5    | Mali          | -    | C            | V  | M  | N  | K  | 14       | -              | -   | -    | -    | -    | 12                               | 6     | 6            | S                              | -                     | 2, 3              |
| 67 | P13    | Mali          | -    | -            | -  | -  | -  | -  | 15       | -              | -   | -    | -    | -    | 10                               | 5     | 5            | S                              | -                     | 2                 |
| 68 | M5     | Mali          | -    | C            | V  | M  | N  | K  | 12       | -              | -   | -    | -    | -    | 8                                | 4     | 4            | S                              | -                     | 2, 3              |
| 69 | 713    | Guinea Bissau | -    | -            | -  | -  | -  | -  | 17       | -              | -   | -    | -    | -    | 16                               | 8     | 8            | S                              | -                     | 2                 |
| 70 | Haiti  | Haiti         | -    | C            | V  | M  | N  | K  | 28       | N              | F   | S    | N    | D    | 6                                | 3     | -            | S                              | -                     | 2, 3              |
| 71 | HB3    | Honduras      | -    | C            | V  | M  | N  | K  | 32       | N              | F   | S    | D    | D    | 16                               | 8     | 8            | S                              | -                     | 2, 3              |

**CQR - pfcr-R & pfmdr1-S alleles**

**CQS - pfcr-S & pfmdr1-R alleles**

\*Codon number.

<sup>†</sup>CQ IC<sub>50</sub> values without VPL reversibility obtained from Foote *et al.* (1), CQ IC<sub>50</sub> values with VPL reversibility obtained from Su *et al.* (2).

<sup>‡</sup>CQ IC<sub>50</sub> values with VPL reversibility obtained from Su *et al.* (2).

<sup>§</sup>Clinical CQ susceptibility phenotypes obtained from Foote *et al.* (1).

<sup>¶</sup>1, current study; 2, Su *et al.* (2); 3, Fidock *et al.* (3); 4, Foote *et al.* (1).

<sup>||</sup>Further data not available.

References:

1. Foote, S. J., Kyle, D. E., Martin, R. K., Oduola, A. M. J., Forsythe, K., Kemp, D. J. & Cowman, A. F. (1990) *Nature (London)* **345**, 255-258.

2. Su, X.-Z., Kirkman, L. S., Fujioka, H. & Wellems, T. W. (1997) *Cell* **91**, 593-603.

3. Fidock, D. A., Nomura, T., Talley, A. K., Cooper, R. A., Dzekunov, S. M., Ferdig, M. T., Ursos, L. M., bir Singh Sidhu, A., Naude, B., Deitsch, K. W., *et al.* (2000) *Mol. Cell* **6**, 861-871.
