# Supplementary material
Source: PubMed Central journal article supplement (PMC60115)
Supplement: pnas_98_22_12689__4.pdf [file pnas_98_22_12689__4.pdf]

Supporting information for Mehlotra *et al.* (2001) *Proc. Natl. Acad. Sci. USA* **98** (22), 12689–12694. (10.1073/pnas.221440898)

**Table 6.** Summary of 41 *P. falciparum* strains having *pfprt* and *pfmdr1* and *in vitro* CQ IC<sub>50</sub> data

|           |   | YSND     | NCDY     | NSND     | NSDD     |    |
|-----------|---|----------|----------|----------|----------|----|
| PfCRT(76) | T | 18       | 2        | <b>3</b> | <b>2</b> | 25 |
|           | K | <b>1</b> | <b>0</b> | 14       | 1        | 16 |
|           |   | 19       | 2        | 17       | 3        | 41 |

**CQR - *pfprt*-R & *pfmdr1*-S alleles**

**CQS - *pfprt*-S & *pfmdr1*-R alleles**
